# Supplementary material
Source: Research Square preprint supplement (doi:10.21203/rs.3.rs-9427085/v1)
Supplement: Supplementary file 1 [file 699e7f3629423e5e03d6aea6.pdf]

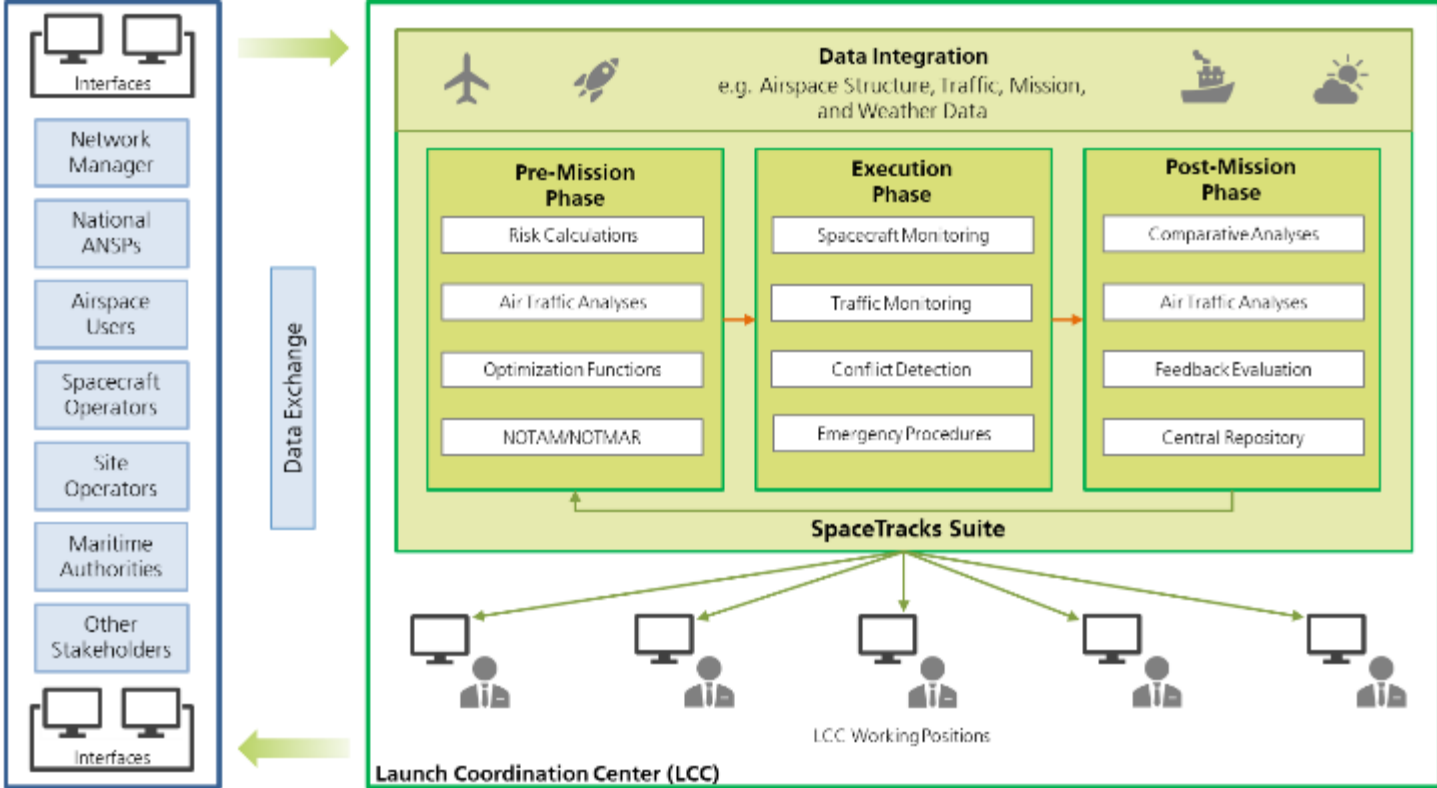

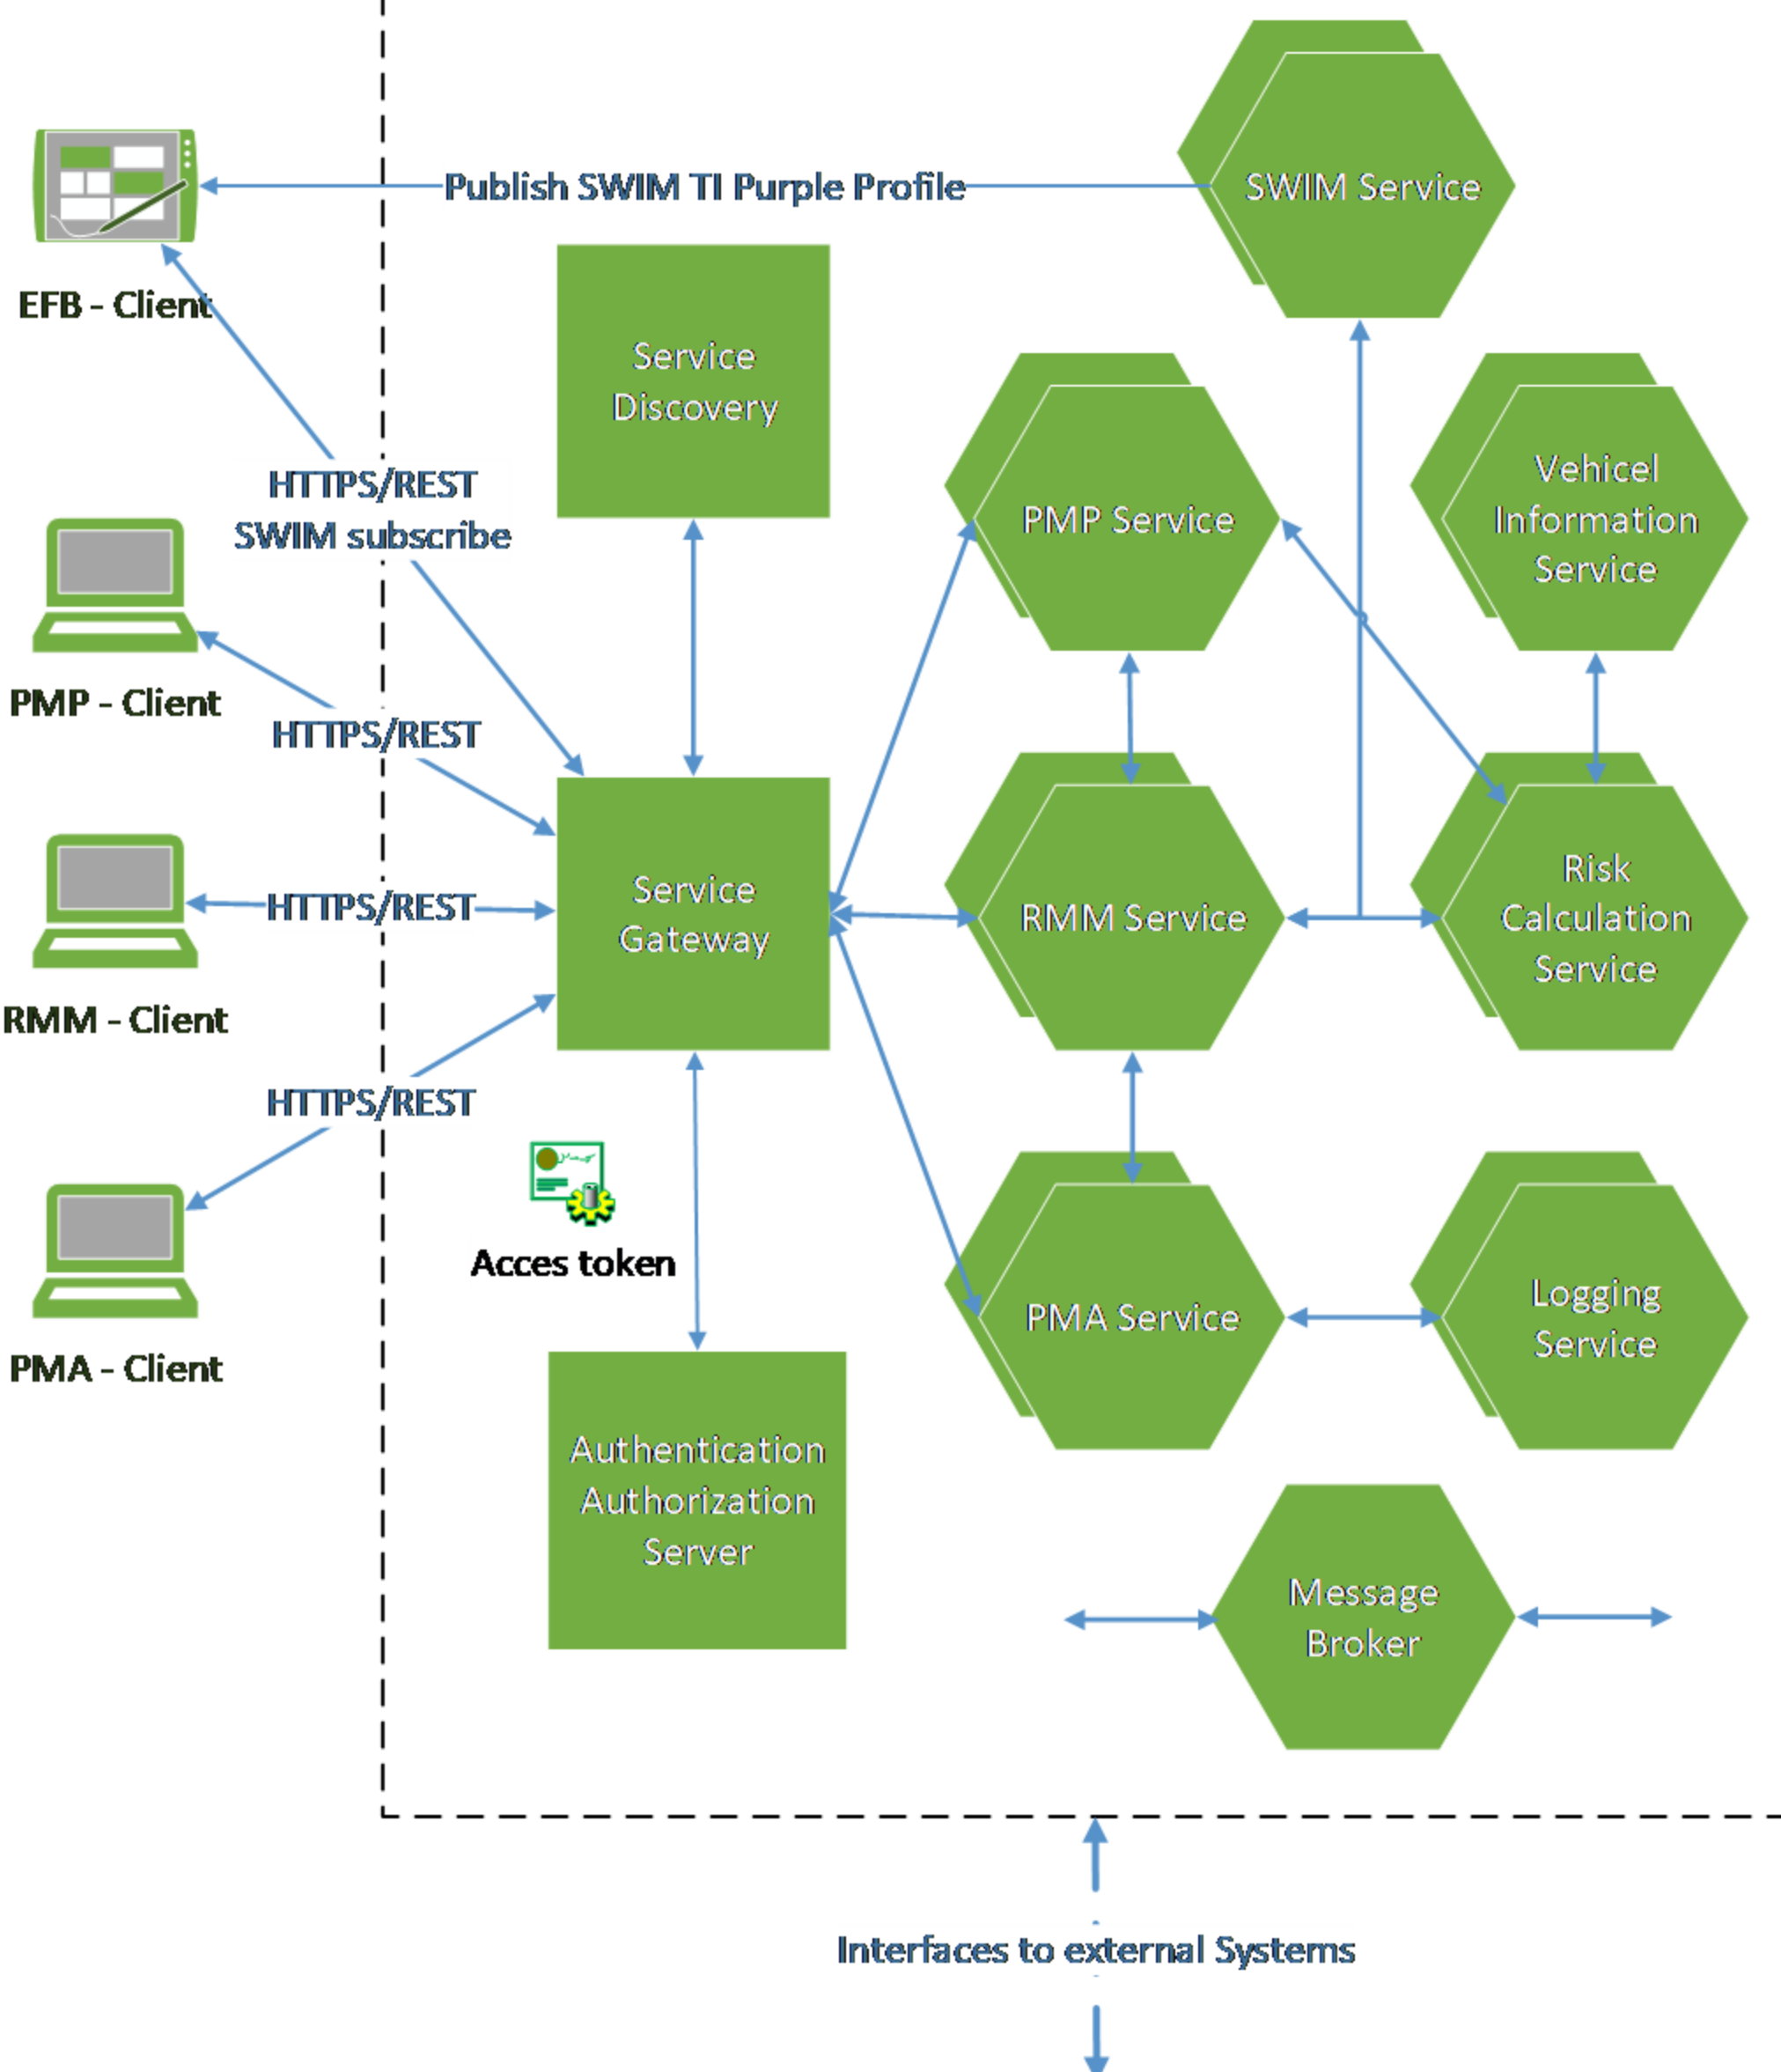

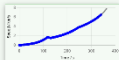

Speed over Time

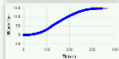

Altitude over Time

| Event               | Time     | Event       |
|---------------------|----------|-------------|
| Launch              | 04:00:00 | 14:00:00:00 |
| Substage Separation | 04:01:00 | 14:00:00:00 |
| 1st Stage Ignition  | 04:01:00 | 14:00:00:00 |

| Phase    | ID    | Time       |
|----------|-------|------------|
| 04:00:00 | 40000 | 0.00000000 |
| 04:01:00 | 40000 | 0.00000000 |
| 04:01:00 | 40000 | 0.00000000 |

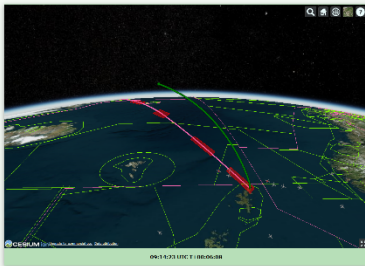

04:01:00:00 UTC | 04:00:00

1st Stage Ignition

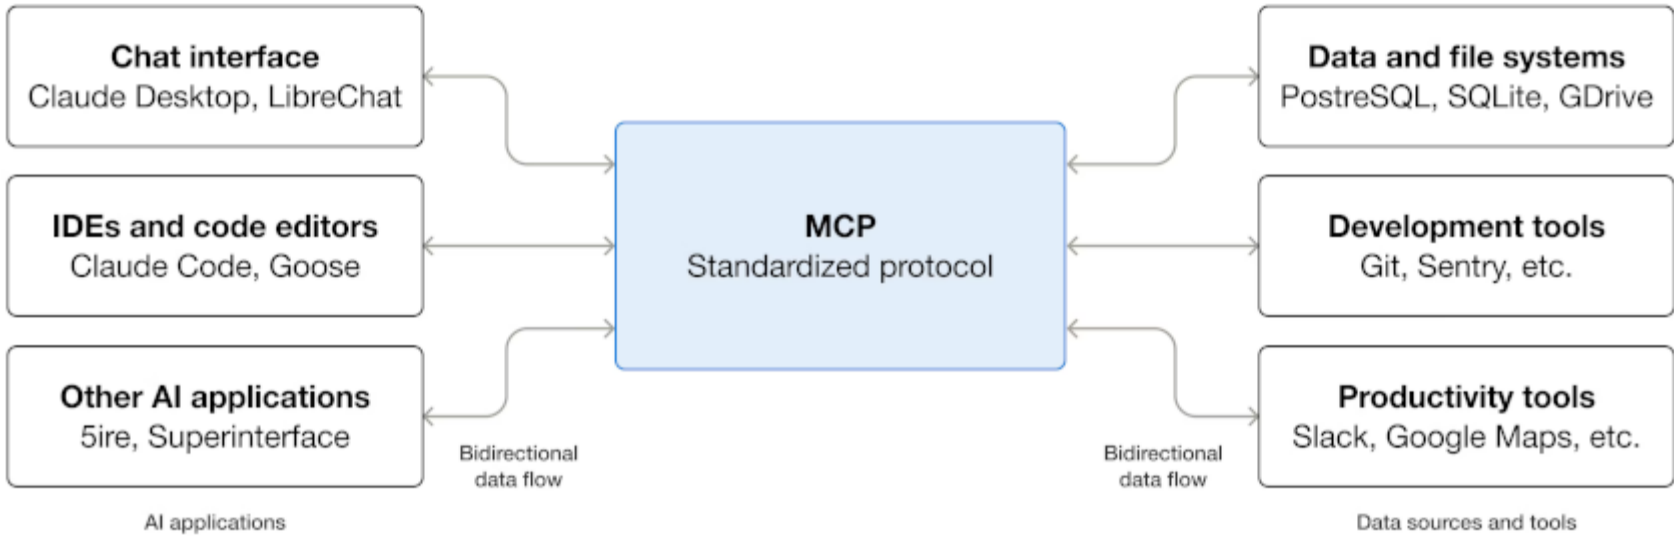

### Document Ingestion - ETL

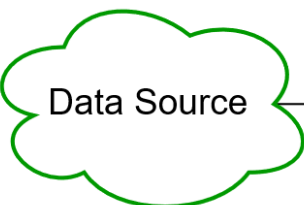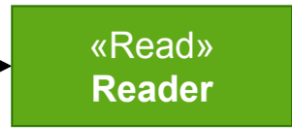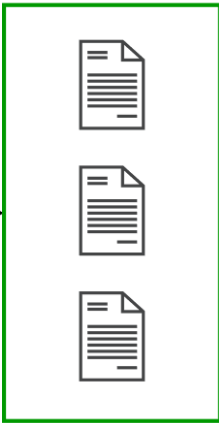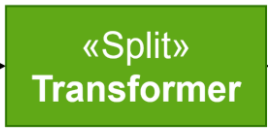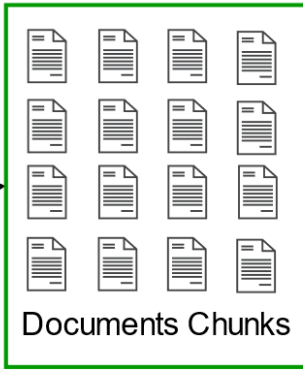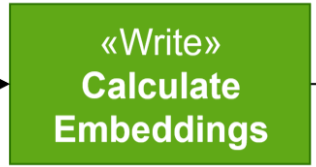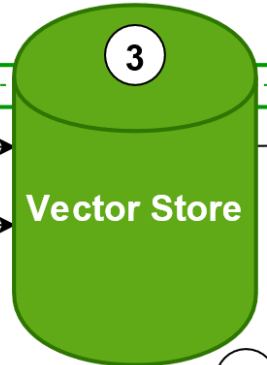

### Retrieval Augmented Generation - RAG

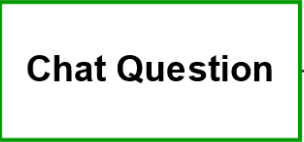

«Retrieve»  
Search for similar documents

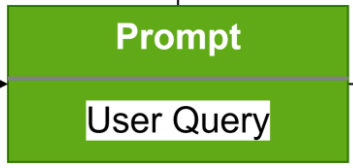

4

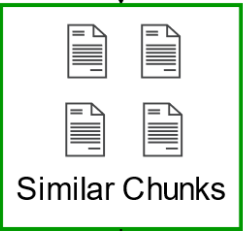

«Augment» +

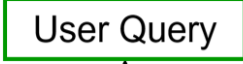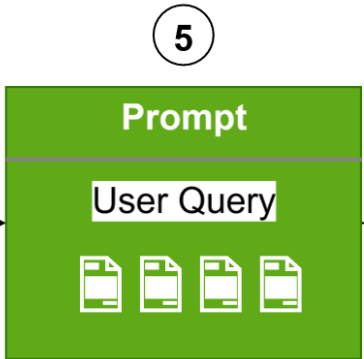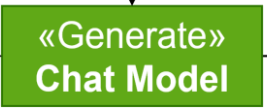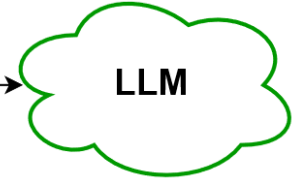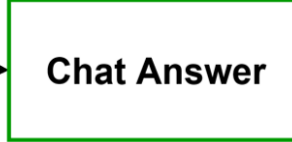

### Retrieval Augmented Generation - RAG

## CM-STM\_2025\_Guidelines Assistant

recommend consulting official resources from national space authorities and relevant international organizations.

Please list the table of content of the Cologne Manual on Space Traffic Management (STM)!

The Cologne Manual on Space Traffic Management (CM-STM) provides a comprehensive framework for managing space traffic. The table of contents includes:

I. Cologne, May 2025 II. Content III. Abbreviations IV. General introduction to the Cologne Manual on Space Traffic Management V. The Imperative of Space Traffic Management: A Comprehensive Framework Rooted in the Principles of International Space Law VI. Guidelines of the Cologne Manual on Space Traffic Management

The guidelines cover various aspects of space traffic management, including:

Pre-launch Activities and Notification (Guideline 1)

Non-governmental Activities and Licensing (Guideline 2)

Registration (Guideline 3)

International Cooperation, Coordination, and Consultation (Guideline 4)

Space Traffic Coordination (Guideline 5)

Space Situational Awareness (Guideline 6)

Information Acquisition and Dissemination (Guideline 7)

Cyber Security (Guideline 8)

Military Activities (Guideline 9)

Communication Systems and International Technical Advisory Body (Guideline 10)

Ensuring long-term accessibility and operational usability of the space environment (Guideline 11)

The manual also provides definitions for space traffic management, including:

Space Traffic Management

Space Situational Awareness

Cyber Security

Please note that this information is based on the provided table of contents and may not be comprehensive or up-to-date.

What should I consider when I plan to launch a rocket in Europe?

Based on the provided text of the Cologne Manual on Space Traffic Management (CM-STM), here are some key considerations when planning to launch a rocket in Europe:

**Pre-launch notification:** Ensure timely notification of pre-launch activities to relevant authorities, including expected re-entry trajectory, location, date, and time.

**Registration:** Register your rocket with the relevant national authority within six months after launch (or one month for objects with an operational lifetime of less than six months).

**International cooperation and coordination:** Communicate with other states, operators, Air Traffic Management systems, and international organizations to ensure safe space traffic coordination.

**Space traffic coordination:** Establish procedures for collision avoidance, re-entry analysis, and fragmentation analysis. Display the point of contact that must be publicly identifiable and available.

**Authorisation and supervision:** Ensure compliance with national space legislation and regulations, including authorisation and supervision of non-governmental space activities.

It's essential to note that these guidelines are meant to ensure the safety of space operations and the responsible use of outer space. If you have any specific questions or concerns about launching a rocket in Europe, I recommend consulting the full text of the Cologne Manual on Space Traffic Management for more detailed information.

Type your question here

Submit

## Evaluation Results

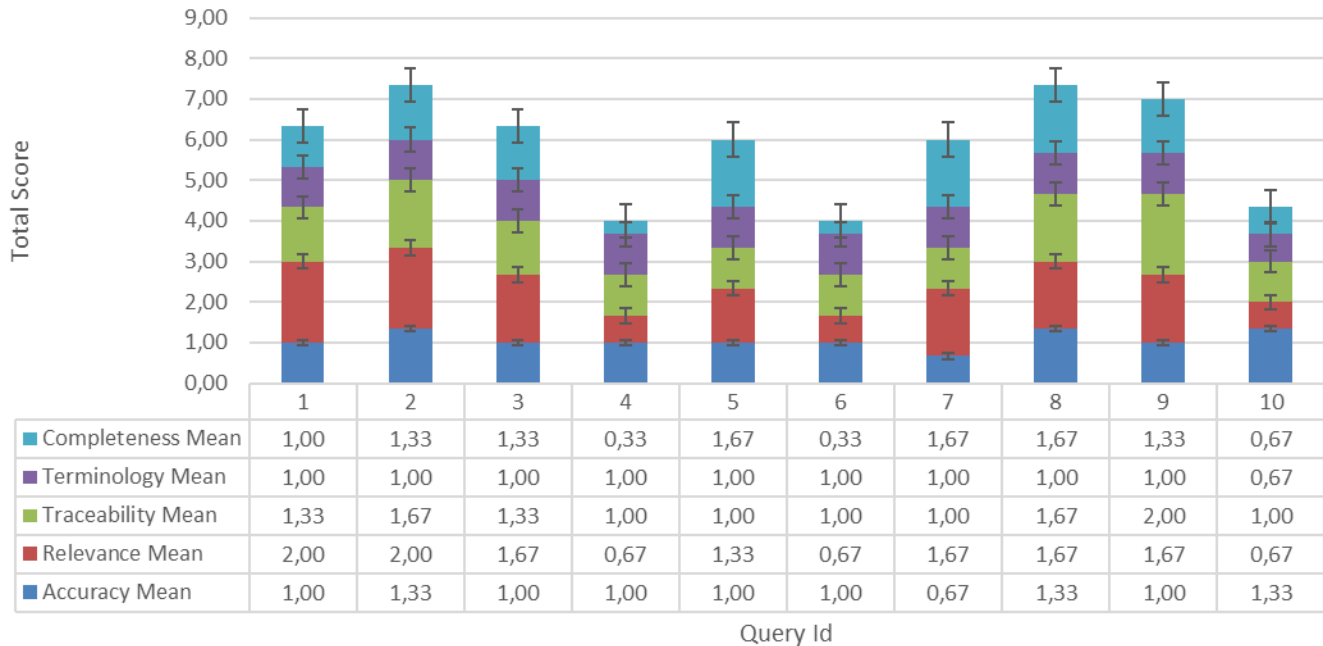

■ Accuracy Mean   
 ■ Relevance Mean   
 ■ Traceability Mean   
 ■ Terminology Mean   
 ■ Completeness Mean
